# Supplementary material for: Female Sex and Mortality in Patients with Staphylococcus aureus Bacteremia: A Systematic Review and Meta-analysis
Source: PubMed Central journal article supplement (PMC10900971; doi:10.1001/jamanetworkopen.2024.0473), 2024-02-27
Supplement: jamanetwopen-e240473-s001.pdf [file jamanetwopen-e240473-s001.pdf]

## Supplemental Online Content

Westgeest AC, Lambregts MC, Ruffin F, et al. Female sex and mortality in patients with *staphylococcus aureus* bacteremia. *JAMA Netw Open*. 2024;7(2):e240473.  
doi:10.1001/jamanetworkopen.2024.0473

**eAppendix 1.** Search Strategies

**eAppendix 2.** Newcastle-Ottawa Quality Assessment Scale for Assessing Risk of Bias in Observational Studies

**eAppendix 3.** Description of EPC Approach

**eAppendix 4.** Influence Analysis Unadjusted Mortality

**eAppendix 5.** Influence Analysis Adjusted Mortality

**eTable 1.** Newcastle-Ottawa Quality Assessment of Individual Studies

**eFigure 1.** Sensitivity Analysis Unadjusted Mortality

**eFigure 2.** Funnel Plot Unadjusted Mortality

**eFigure 3.** Sensitivity Analysis Adjusted Mortality

**eFigure 4.** Funnel Plot Adjusted Mortality

**eTable 2.** Evidence Profile for Association of Female Sex and Mortality in Patients With *Staphylococcus Aureus* Bacteremia

This supplemental material has been provided by the authors to give readers additional information about their work.

## **eAppendix 1. Search Strategy Report: Original Search**

Topic: Association of female sex with mortality in patients with *Staphylococcus aureus*

bloodstream infections

Searcher: SJK

Date: 10.31.2022 Updated 4.26.2023

Database (including vendor/platform): MEDLINE (via PubMed)

| <b>Set #</b>             | <b>Search Strategy</b>                                                                                                                                                                                                                                                                                                                                                                                                   | <b>Results</b>  |
|--------------------------|--------------------------------------------------------------------------------------------------------------------------------------------------------------------------------------------------------------------------------------------------------------------------------------------------------------------------------------------------------------------------------------------------------------------------|-----------------|
| <b>#1 Staph</b>          | "Staphylococcus aureus"[Mesh] OR "staphylococcus aureus"[tiab] OR "s. aureus"[tiab] OR "s aureus"[tiab] OR "staph aureus"[tiab]                                                                                                                                                                                                                                                                                          | <b>150579</b>   |
| <b>#2 Infection</b>      | "Endocarditis, Bacterial"[Mesh] OR "Bacteremia"[Mesh] OR bacteremia[tiab] OR bacteraemia[tiab] OR bacteremias[tiab] OR bacteraemias[tiab] OR bacteremic[tiab] OR bacteraemic[tiab] OR ((bloodstream[tiab] OR "blood stream"[tiab] OR bloodstreams[tiab] OR "blood streams"[tiab]) AND (infection[tiab] OR infections[tiab] OR infected[tiab] OR infect[tiab] OR infects[tiab] OR infecting[tiab])) OR endocarditis[tiab] | <b>105361</b>   |
| <b>#3 Mortality</b>      | "Mortality"[sh] OR "Mortality"[Mesh] OR mortality[tiab] OR mortalities[tiab] OR fatal[tiab] OR fatality[tiab] OR fatalities[tiab] OR death[tiab] OR deaths[tiab] OR dying[tiab] OR die[tiab] OR died[tiab]                                                                                                                                                                                                               | <b>2467469</b>  |
| <b>#4 Sex</b>            | "Female"[Mesh] OR "Male"[Mesh] OR "Sex Factors"[Mesh] OR female[tiab] OR females[tiab] OR male[tiab] OR males[tiab] OR women[tiab] OR woman[tiab] OR "womens" OR "womans" OR men[tiab] OR gender[tiab] OR genders[tiab] OR sex[tiab] OR sexes[tiab]                                                                                                                                                                      | <b>13302123</b> |
| <b>#5</b>                | 1 AND 2 AND 3 AND 4                                                                                                                                                                                                                                                                                                                                                                                                      | <b>3106</b>     |
| <b>#6</b>                | AND ("2022/01/01"[Date - MeSH] : "3000"[Date - MeSH])                                                                                                                                                                                                                                                                                                                                                                    | <b>119</b>      |
| <b>Validation String</b> | 27343816 OR 26873381 OR 30194636 OR 29667110 OR 31185081 OR 23141419                                                                                                                                                                                                                                                                                                                                                     | <b>6/6</b>      |

Database (including vendor/platform): Embase via Elsevier

| Set #               | Search Strategy                                                                                                                                                                                                                                                                                                                                                                                                     | Results         |
|---------------------|---------------------------------------------------------------------------------------------------------------------------------------------------------------------------------------------------------------------------------------------------------------------------------------------------------------------------------------------------------------------------------------------------------------------|-----------------|
| <b>#1 Staph</b>     | 'Staphylococcus aureus'/exp OR 'staphylococcus aureus':ti,ab OR 's. aureus':ti,ab OR 's aureus':ti,ab OR 'staph aureus':ti,ab                                                                                                                                                                                                                                                                                       | <b>249714</b>   |
| <b>#2 Infection</b> | 'bacteremia'/exp OR 'bacterial endocarditis'/exp OR bacteremia:ti,ab OR bacteraemia:ti,ab OR bacteremias:ti,ab OR bacteraemias:ti,ab OR bacteremic:ti,ab OR bacteraemic:ti,ab OR ((bloodstream:ti,ab OR 'blood stream':ti,ab OR bloodstreams:ti,ab OR 'blood streams':ti,ab) AND (infection:ti,ab OR infections:ti,ab OR infected:ti,ab OR infect:ti,ab OR infects:ti,ab OR infecting:ti,ab)) OR endocarditis:ti,ab | <b>153847</b>   |
| <b>#3 Mortality</b> | 'mortality'/de OR 'mortality rate'/exp OR mortality:ti,ab OR mortalities:ti,ab OR fatal:ti,ab OR fatality:ti,ab OR fatalities:ti,ab OR death:ti,ab OR deaths:ti,ab OR dying:ti,ab OR die:ti,ab OR died:ti,ab                                                                                                                                                                                                        | <b>3345439</b>  |
| <b>#4 Sex</b>       | 'female'/exp OR 'male'/exp OR 'sex difference'/exp OR female:ti,ab OR females:ti,ab OR male:ti,ab OR males:ti,ab OR women:ti,ab OR woman:ti,ab OR womens OR womans OR men:ti,ab OR gender:ti,ab OR genders:ti,ab OR sex:ti,ab OR sexes:ti,ab                                                                                                                                                                        | <b>16110857</b> |
| <b>#5</b>           | #1 AND #2 AND #3 AND #4                                                                                                                                                                                                                                                                                                                                                                                             | <b>6105</b>     |
| <b>#6</b>           | #1 AND #2 AND #3 AND #4 AND [humans]/lim AND ([article]/lim OR [article in press]/lim OR [conference paper]/lim)                                                                                                                                                                                                                                                                                                    | <b>4138</b>     |
| <b>#7</b>           | #1 AND #2 AND #3 AND #4 AND [humans]/lim AND ([article]/lim OR [article in press]/lim OR [conference paper]/lim) AND [01-09-2022]/sd NOT [27-04-2023]/sd                                                                                                                                                                                                                                                            | <b>334</b>      |

Database (including vendor/platform): Web of Science Core Collection (1900-present) via Clarivate

| Set #               | Search Strategy                                                                                                                                                                                                                                                 | Results        |
|---------------------|-----------------------------------------------------------------------------------------------------------------------------------------------------------------------------------------------------------------------------------------------------------------|----------------|
| <b>#1 Staph</b>     | TS=("staphylococcus aureus" OR "s. aureus" OR "s aureus" OR "staph aureus")                                                                                                                                                                                     | <b>179081</b>  |
| <b>#2 Infection</b> | TS=( bacteremia OR bacteraemia OR bacteremias OR bacteraemias OR bacteremic OR bacteraemic OR ((bloodstream OR "blood stream" OR bloodstreams OR "blood streams") AND (infection OR infections OR infected OR infect OR infects OR infecting)) OR endocarditis) | <b>102399</b>  |
| <b>#3 Mortality</b> | TS=( mortality OR mortalities OR fatal OR fatality OR fatalities OR death OR deaths OR dying OR die OR died)                                                                                                                                                    | <b>2964183</b> |

|               |                                                                                                                           |                |
|---------------|---------------------------------------------------------------------------------------------------------------------------|----------------|
| <b>#4 Sex</b> | TS=(female OR females OR male OR males OR women OR woman OR womens OR womans OR men OR gender OR genders OR sex OR sexes) | <b>4924618</b> |
| <b>#5</b>     | 1 AND 2 AND 3 AND 4                                                                                                       | <b>936</b>     |
| <b>#6</b>     | Refined by Publication Years: 2022 or 2023                                                                                | <b>101</b>     |

**eAppendix 2. Newcastle-Ottawa Quality Assessment Scale for assessing risk of bias in observational studies.** Risk of bias was assessed with the Newcastle-Ottawa Assessment Scale using the questions below. The procedure for converting the responses to an overall risk of bias assessment (i.e., low, medium, or high risk of bias) is detailed here as well.

### Selection

#### 1. Representativeness of the exposed cohort

- a. Truly representative of the average patient with *S. aureus* bloodstream infection in the community (\*)
- b. Somewhat representative of the average patient with *S. aureus* bloodstream infection in the community (\*)
- c. Selected group of patients
- d. No description of the derivation of the cohort

#### 2. Selection of the non-exposed cohort

- a. Drawn from the same community as the exposed cohort (\*)
- b. Drawn from a different source
- c. No description of the derivation of the non-exposed cohort

#### 3. Ascertainment of exposure

- a. Secure record (e.g. medical records) (\*)
- b. Structured interview (\*)
- c. Written self-report
- d. No description

#### 4. Demonstration that outcome of interest was not present at start of study

- a. Yes (\*)
- b. No

### Comparability of cohorts on basis of design or analysis

#### 1. Study controls for level of acute illness

- a. Yes (\*)
- b. No

2. Study controls for any additional factor.

- a. Yes (\*)
- b. No

### Outcome

1. Assessment of outcome

- a. Independent blind assessment (\*)
- b. Record linkage (\*)
- c. Self-report
- d. No description

2. Was follow-up long enough for outcomes to occur

- a. Yes (\*)
- b. No

3. Adequacy of follow up of cohorts

- a. Complete follow up (all subjects accounted for) (\*)
- b. Subjects lost to follow up unlikely to introduce bias ( $\leq 10\%$  lost to follow-up, or description provided of those lost) (\*)
- c. Follow up rate  $< 90\%$  and no description of those lost
- d. No statement

Thresholds used to convert the Newcastle-Ottawa scale to categories (good, fair, and poor):

**Good quality/low risk of bias:** 3 or 4 stars in selection domain AND 1 or 2 stars in comparability domain AND 2 or 3 stars in outcome/exposure domain

**Fair quality/medium risk of bias:** 2 stars in selection domain AND 1 or 2 stars in comparability domain AND 2 or 3 stars in outcome/exposure domain.

**Poor quality/high risk of bias:** 0 or 1 star in selection domain OR 0 stars in comparability domain OR 0 or 1 stars in outcome/exposure domain

### **eAppendix 3. Description of EPC approach.**

We used the Evidence-based Practice Center (EPC) model from the U.S. Agency for Healthcare Research and Quality (AHRQ) to grade the overall strength of evidence [20]. The EPC approach evaluates the following domains: study limitations/risk of bias, consistency, directness, precision, and reporting bias. In brief, the EPC classification system applies an overall strength of evidence grade rating to an estimate effect from a body of evidence: high (we are very confident that the estimate of effect lies close to the true effect for this outcome), moderate (we are moderately confident that the estimate of effect lies close to the true effect for this outcome), low (we have limited confidence that the estimate of effect lies close to the true effect for this outcome), or insufficient (we have no evidence, we are unable to estimate an effect, or we have no confidence in the estimate of effect for this outcome). The initial strength of evidence grade was moderate given that the included observational studies in the primary adjusted analysis reduced bias from confounding through matching or statistical adjustment [20]. This baseline category could be rated down if the included studies demonstrated high risk of bias, imprecision, inconsistency, indirectness, or reporting bias.

**eAppendix 4. Influence analysis of unadjusted mortality in patients with *Staphylococcus aureus* bacteremia.** An influence analysis showed that the overall results of the meta-analysis (i.e., association of female sex with increased mortality) did not change with removal of individual studies.

|                                       | OR     | 95%-CI           | p-value  | tau <sup>2</sup> | tau    | I <sup>2</sup> |
|---------------------------------------|--------|------------------|----------|------------------|--------|----------------|
| Omitting Abbas 2020                   | 1.1193 | [1.0648; 1.1766] | < 0.0001 | 0.0139           | 0.1178 | 37.8%          |
| Omitting Abbas 2020                   | 1.1201 | [1.0656; 1.1774] | < 0.0001 | 0.0138           | 0.1177 | 37.6%          |
| Omitting Allard 2008                  | 1.1153 | [1.0611; 1.1724] | < 0.0001 | 0.0139           | 0.1178 | 37.0%          |
| Omitting Ammerlaan 2009               | 1.1203 | [1.0657; 1.1777] | < 0.0001 | 0.0139           | 0.1179 | 37.6%          |
| Omitting Asgeirsson 2011              | 1.1174 | [1.0627; 1.1748] | < 0.0001 | 0.0141           | 0.1189 | 37.6%          |
| Omitting Austin 2020                  | 1.1119 | [1.0605; 1.1659] | < 0.0001 | 0.0101           | 0.1007 | 31.3%          |
| Omitting Ayau 2017                    | 1.1242 | [1.0697; 1.1814] | < 0.0001 | 0.0133           | 0.1153 | 36.4%          |
| Omitting Bassetti 2017                | 1.1195 | [1.0648; 1.1770] | < 0.0001 | 0.0140           | 0.1183 | 37.7%          |
| Omitting Battle 2022                  | 1.1238 | [1.0696; 1.1807] | < 0.0001 | 0.0133           | 0.1153 | 36.4%          |
| Omitting Ben-zvi 2019                 | 1.1172 | [1.0629; 1.1744] | < 0.0001 | 0.0140           | 0.1182 | 37.5%          |
| Omitting Blomfeldt 2016               | 1.1166 | [1.0625; 1.1733] | < 0.0001 | 0.0138           | 0.1177 | 37.1%          |
| Omitting Braquet 2016                 | 1.1143 | [1.0597; 1.1717] | < 0.0001 | 0.0139           | 0.1181 | 36.8%          |
| Omitting Chavez 2022                  | 1.1180 | [1.0633; 1.1755] | < 0.0001 | 0.0142           | 0.1190 | 37.7%          |
| Omitting Chen 2010                    | 1.1215 | [1.0667; 1.1791] | < 0.0001 | 0.0139           | 0.1180 | 37.3%          |
| Omitting Chen 2015                    | 1.1195 | [1.0648; 1.1769] | < 0.0001 | 0.0140           | 0.1182 | 37.7%          |
| Omitting Chen 2021                    | 1.1191 | [1.0644; 1.1766] | < 0.0001 | 0.0140           | 0.1185 | 37.8%          |
| Omitting Chihara 2009                 | 1.1179 | [1.0636; 1.1750] | < 0.0001 | 0.0139           | 0.1180 | 37.6%          |
| Omitting Chung 2021                   | 1.1202 | [1.0657; 1.1775] | < 0.0001 | 0.0138           | 0.1176 | 37.6%          |
| Omitting Cosgrove 2005                | 1.1229 | [1.0688; 1.1797] | < 0.0001 | 0.0134           | 0.1159 | 36.6%          |
| Omitting Eells 2013                   | 1.1144 | [1.0622; 1.1691] | < 0.0001 | 0.0130           | 0.1140 | 34.5%          |
| Omitting Forsblom 2018                | 1.1203 | [1.0656; 1.1778] | < 0.0001 | 0.0139           | 0.1181 | 37.6%          |
| Omitting Gasch 2013                   | 1.1181 | [1.0633; 1.1757] | < 0.0001 | 0.0142           | 0.1192 | 37.7%          |
| Omitting Greenberg 2014               | 1.1191 | [1.0645; 1.1765] | < 0.0001 | 0.0140           | 0.1182 | 37.8%          |
| Omitting Guillamet 2018               | 1.1180 | [1.0636; 1.1753] | < 0.0001 | 0.0140           | 0.1181 | 37.6%          |
| Omitting Hagstrand Aldman 2022        | 1.1190 | [1.0643; 1.1764] | < 0.0001 | 0.0140           | 0.1184 | 37.8%          |
| Omitting Halli 2012                   | 1.1227 | [1.0705; 1.1775] | < 0.0001 | 0.0133           | 0.1155 | 34.1%          |
| Omitting Han 2012                     | 1.1163 | [1.0625; 1.1729] | < 0.0001 | 0.0138           | 0.1174 | 36.8%          |
| Omitting Honda 2010                   | 1.1181 | [1.0635; 1.1754] | < 0.0001 | 0.0140           | 0.1183 | 37.7%          |
| Omitting Horvath 2020                 | 1.1176 | [1.0630; 1.1749] | < 0.0001 | 0.0141           | 0.1185 | 37.6%          |
| Omitting Hsu 2007                     | 1.1234 | [1.0698; 1.1797] | < 0.0001 | 0.0132           | 0.1151 | 35.9%          |
| Omitting Jokinen 2017                 | 1.1185 | [1.0638; 1.1760] | < 0.0001 | 0.0141           | 0.1186 | 37.8%          |
| Omitting Joo 2013                     | 1.1227 | [1.0687; 1.1795] | < 0.0001 | 0.0134           | 0.1160 | 36.6%          |
| Omitting Joost 2017                   | 1.1214 | [1.0662; 1.1795] | < 0.0001 | 0.0142           | 0.1191 | 37.2%          |
| Omitting Jorgensen 2019               | 1.1172 | [1.0628; 1.1744] | < 0.0001 | 0.0140           | 0.1183 | 37.5%          |
| Omitting Kang 2018                    | 1.1207 | [1.0655; 1.1787] | < 0.0001 | 0.0143           | 0.1196 | 37.4%          |
| Omitting Kempker 2010                 | 1.1216 | [1.0668; 1.1793] | < 0.0001 | 0.0139           | 0.1180 | 37.3%          |
| Omitting Kim 2008                     | 1.1200 | [1.0654; 1.1774] | < 0.0001 | 0.0139           | 0.1180 | 37.6%          |
| Omitting Kim 2010                     | 1.1196 | [1.0648; 1.1772] | < 0.0001 | 0.0141           | 0.1188 | 37.7%          |
| Omitting Kim 2019                     | 1.1224 | [1.0682; 1.1793] | < 0.0001 | 0.0135           | 0.1163 | 36.8%          |
| Omitting Kim 2019                     | 1.1205 | [1.0659; 1.1779] | < 0.0001 | 0.0139           | 0.1178 | 37.5%          |
| Omitting Kobayashi 2014               | 1.1187 | [1.0640; 1.1762] | < 0.0001 | 0.0141           | 0.1187 | 37.8%          |
| Omitting Lamagni 2011                 | 1.1204 | [1.0646; 1.1791] | < 0.0001 | 0.0148           | 0.1215 | 36.4%          |
| Omitting Laupland 2022                | 1.1179 | [1.0621; 1.1766] | < 0.0001 | 0.0151           | 0.1228 | 37.6%          |
| Omitting Lee 2013                     | 1.1184 | [1.0638; 1.1757] | < 0.0001 | 0.0140           | 0.1183 | 37.7%          |
| Omitting Lee 2021                     | 1.1216 | [1.0675; 1.1784] | < 0.0001 | 0.0136           | 0.1167 | 36.9%          |
| Omitting Lee 2021                     | 1.1196 | [1.0648; 1.1772] | < 0.0001 | 0.0141           | 0.1187 | 37.7%          |
| Omitting Lesens 2006                  | 1.1200 | [1.0655; 1.1772] | < 0.0001 | 0.0138           | 0.1176 | 37.6%          |
| Omitting Mansur 2012                  | 1.1130 | [1.0596; 1.1691] | < 0.0001 | 0.0127           | 0.1127 | 35.3%          |
| Omitting Mejer 2012                   | 1.1185 | [1.0628; 1.1772] | < 0.0001 | 0.0150           | 0.1225 | 37.5%          |
| Omitting Mejer 2012                   | 1.1128 | [1.0585; 1.1699] | < 0.0001 | 0.0133           | 0.1152 | 34.9%          |
| Omitting Melzer 2013                  | 1.1239 | [1.0700; 1.1805] | < 0.0001 | 0.0132           | 0.1149 | 36.1%          |
| Omitting Molkanen 2016                | 1.1200 | [1.0654; 1.1774] | < 0.0001 | 0.0139           | 0.1180 | 37.6%          |
| Omitting Murdoch 2017                 | 1.1158 | [1.0609; 1.1737] | < 0.0001 | 0.0144           | 0.1201 | 37.5%          |
| Omitting Nambiar 2018                 | 1.1212 | [1.0659; 1.1793] | < 0.0001 | 0.0143           | 0.1196 | 37.2%          |
| Omitting Osthoff 2016                 | 1.1292 | [1.0770; 1.1838] | < 0.0001 | 0.0116           | 0.1075 | 32.8%          |
| Omitting Papadimitriou-Olivgeris 2023 | 1.1208 | [1.0662; 1.1781] | < 0.0001 | 0.0138           | 0.1176 | 37.5%          |
| Omitting Park 2015                    | 1.1224 | [1.0680; 1.1794] | < 0.0001 | 0.0136           | 0.1165 | 36.9%          |
| Omitting Paulsen 2015                 | 1.1182 | [1.0636; 1.1757] | < 0.0001 | 0.0141           | 0.1187 | 37.7%          |
| Omitting Perovic 2006                 | 1.1213 | [1.0668; 1.1787] | < 0.0001 | 0.0138           | 0.1175 | 37.3%          |
| Omitting Rieg 2009                    | 1.1196 | [1.0648; 1.1772] | < 0.0001 | 0.0141           | 0.1186 | 37.7%          |
| Omitting Roth 2017                    | 1.1182 | [1.0635; 1.1757] | < 0.0001 | 0.0141           | 0.1188 | 37.7%          |
| Omitting Saunderson 2015              | 1.1190 | [1.0643; 1.1765] | < 0.0001 | 0.0141           | 0.1186 | 37.8%          |
| Omitting Seas 2018                    | 1.1178 | [1.0629; 1.1754] | < 0.0001 | 0.0143           | 0.1195 | 37.7%          |
| Omitting Smit 2017                    | 1.1124 | [1.0591; 1.1682] | < 0.0001 | 0.0121           | 0.1101 | 34.2%          |
| Omitting Soriano 2000                 | 1.1168 | [1.0623; 1.1741] | < 0.0001 | 0.0141           | 0.1186 | 37.5%          |
| Omitting Soriano 2008                 | 1.1179 | [1.0633; 1.1753] | < 0.0001 | 0.0141           | 0.1186 | 37.7%          |
| Omitting Sullivan 2017                | 1.1165 | [1.0627; 1.1730] | < 0.0001 | 0.0138           | 0.1174 | 36.8%          |
| Omitting Szubert 2019                 | 1.1209 | [1.0665; 1.1782] | < 0.0001 | 0.0138           | 0.1174 | 37.4%          |
| Omitting Tan 2021                     | 1.1170 | [1.0628; 1.1740] | < 0.0001 | 0.0139           | 0.1179 | 37.3%          |
| Omitting Ternavasio-de la Vega 2018   | 1.1219 | [1.0676; 1.1788] | < 0.0001 | 0.0136           | 0.1167 | 37.0%          |
| Omitting Thorlacius-Ussing 2019       | 1.1124 | [1.0580; 1.1696] | < 0.0001 | 0.0131           | 0.1146 | 32.4%          |
| Omitting Thwaites 2010                | 1.1187 | [1.0639; 1.1763] | < 0.0001 | 0.0142           | 0.1190 | 37.8%          |
| Omitting Tong 2012                    | 1.1234 | [1.0681; 1.1816] | < 0.0001 | 0.0139           | 0.1178 | 36.0%          |
| Omitting Turnidge 2007                | 1.1185 | [1.0638; 1.1761] | < 0.0001 | 0.0141           | 0.1187 | 37.8%          |
| Omitting Turnidge 2009                | 1.1242 | [1.0695; 1.1818] | < 0.0001 | 0.0134           | 0.1158 | 36.4%          |
| Omitting vanHal 2011                  | 1.1182 | [1.0635; 1.1757] | < 0.0001 | 0.0141           | 0.1187 | 37.7%          |
| Omitting wang 2008                    | 1.1168 | [1.0634; 1.1730] | < 0.0001 | 0.0138           | 0.1173 | 36.5%          |
| Omitting wang 2013                    | 1.1187 | [1.0641; 1.1761] | < 0.0001 | 0.0140           | 0.1182 | 37.8%          |
| Omitting wang 2015                    | 1.1224 | [1.0680; 1.1795] | < 0.0001 | 0.0136           | 0.1166 | 37.0%          |
| Omitting wi 2018                      | 1.1214 | [1.0669; 1.1787] | < 0.0001 | 0.0138           | 0.1173 | 37.3%          |
| Omitting willekens 2021               | 1.1176 | [1.0630; 1.1749] | < 0.0001 | 0.0140           | 0.1185 | 37.6%          |
| Omitting Yilmaz 2016                  | 1.1209 | [1.0666; 1.1780] | < 0.0001 | 0.0137           | 0.1172 | 37.3%          |
| Omitting Yoon 2016                    | 1.1246 | [1.0714; 1.1804] | < 0.0001 | 0.0130           | 0.1138 | 35.2%          |
| Pooled estimate                       | 1.1193 | [1.0652; 1.1761] | < 0.0001 | 0.0138           | 0.1174 | 37.0%          |



**eAppendix 5. Influence analysis of adjusted mortality in patients with *Staphylococcus aureus***

**bacteremia.** An influence analysis showed that the overall results of the meta-analysis (i.e., association of female sex with increased mortality) did not change with removal of individual studies.

|                                 | OR     | 95%-CI           | p-value  | tauA2  | tau    | IA2   |
|---------------------------------|--------|------------------|----------|--------|--------|-------|
| Omitting Allard 2008            | 1.1757 | [1.0998; 1.2568] | < 0.0001 | 0.0117 | 0.1084 | 50.0% |
| Omitting Austin 2020            | 1.1619 | [1.0920; 1.2363] | < 0.0001 | 0.0081 | 0.0898 | 44.1% |
| Omitting Bai 2015               | 1.1784 | [1.1021; 1.2600] | < 0.0001 | 0.0121 | 0.1102 | 50.7% |
| Omitting Benfield 2007          | 1.1956 | [1.1181; 1.2785] | < 0.0001 | 0.0109 | 0.1045 | 48.1% |
| Omitting Benfield 2007          | 1.1956 | [1.1164; 1.2805] | < 0.0001 | 0.0117 | 0.1084 | 47.4% |
| Omitting Blomfeldt 2016         | 1.1840 | [1.1053; 1.2683] | < 0.0001 | 0.0128 | 0.1132 | 52.2% |
| Omitting Braquet 2016           | 1.1780 | [1.0993; 1.2623] | < 0.0001 | 0.0127 | 0.1127 | 50.8% |
| Omitting Chen 2010              | 1.1911 | [1.1132; 1.2744] | < 0.0001 | 0.0125 | 0.1119 | 51.1% |
| Omitting Cobussen 2018          | 1.1840 | [1.1057; 1.2678] | < 0.0001 | 0.0126 | 0.1124 | 52.2% |
| Omitting Eells 2013             | 1.1753 | [1.1026; 1.2528] | < 0.0001 | 0.0114 | 0.1069 | 48.3% |
| Omitting Forsblom 2018          | 1.1838 | [1.1047; 1.2685] | < 0.0001 | 0.0130 | 0.1140 | 52.2% |
| Omitting Gasch 2013             | 1.1796 | [1.1016; 1.2632] | < 0.0001 | 0.0126 | 0.1123 | 51.4% |
| Omitting Joo 2013               | 1.1837 | [1.1051; 1.2678] | < 0.0001 | 0.0128 | 0.1130 | 52.2% |
| Omitting Kang 2018              | 1.1923 | [1.1158; 1.2740] | < 0.0001 | 0.0120 | 0.1094 | 50.1% |
| Omitting Lamagni 2011           | 1.1953 | [1.1155; 1.2807] | < 0.0001 | 0.0122 | 0.1103 | 48.1% |
| Omitting Laupland 2022          | 1.1884 | [1.1061; 1.2769] | < 0.0001 | 0.0146 | 0.1209 | 52.2% |
| Omitting Lee 2021               | 1.1845 | [1.1054; 1.2693] | < 0.0001 | 0.0130 | 0.1142 | 52.2% |
| Omitting Mansur 2012            | 1.1715 | [1.0967; 1.2514] | < 0.0001 | 0.0108 | 0.1041 | 48.6% |
| Omitting Maor 2009              | 1.1775 | [1.1024; 1.2577] | < 0.0001 | 0.0119 | 0.1092 | 50.0% |
| Omitting Mejer 2012             | 1.1911 | [1.1089; 1.2793] | < 0.0001 | 0.0143 | 0.1196 | 51.9% |
| Omitting Mejer 2012             | 1.1833 | [1.1016; 1.2711] | < 0.0001 | 0.0143 | 0.1196 | 51.0% |
| Omitting Meredith 2021          | 1.1864 | [1.1076; 1.2708] | < 0.0001 | 0.0129 | 0.1138 | 52.1% |
| Omitting Murdoch 2017           | 1.1853 | [1.1047; 1.2718] | < 0.0001 | 0.0138 | 0.1174 | 52.2% |
| Omitting Nambiar 2018           | 1.1850 | [1.1042; 1.2718] | < 0.0001 | 0.0139 | 0.1180 | 52.1% |
| Omitting Osthoff 2016           | 1.1890 | [1.1110; 1.2725] | < 0.0001 | 0.0128 | 0.1129 | 51.5% |
| Omitting Rieg 2013              | 1.1873 | [1.1102; 1.2697] | < 0.0001 | 0.0126 | 0.1124 | 51.2% |
| Omitting Saunderson 2015        | 1.1867 | [1.1080; 1.2710] | < 0.0001 | 0.0129 | 0.1137 | 52.0% |
| Omitting Schneider 2020         | 1.1820 | [1.1034; 1.2661] | < 0.0001 | 0.0128 | 0.1132 | 51.9% |
| Omitting Smit 2017              | 1.1757 | [1.0974; 1.2596] | < 0.0001 | 0.0123 | 0.1110 | 49.8% |
| Omitting Soriano 2000           | 1.1776 | [1.1015; 1.2588] | < 0.0001 | 0.0120 | 0.1096 | 50.4% |
| Omitting Szubert 2019           | 1.1887 | [1.1127; 1.2698] | < 0.0001 | 0.0125 | 0.1117 | 50.4% |
| Omitting Thorlacius-Ussing 2019 | 1.1848 | [1.1028; 1.2729] | < 0.0001 | 0.0145 | 0.1204 | 51.5% |
| Omitting Thwaites 2010          | 1.1876 | [1.1087; 1.2722] | < 0.0001 | 0.0130 | 0.1142 | 52.0% |
| Omitting Yahav 2017             | 1.1762 | [1.0989; 1.2589] | < 0.0001 | 0.0121 | 0.1100 | 50.4% |
| Pooled estimate                 | 1.1836 | [1.1067; 1.2658] | < 0.0001 | 0.0125 | 0.1119 | 50.7% |

**eTable 1. Newcastle-Ottawa quality assessment of individual studies**

The Newcastle-Ottawa Quality Assessment Scale determines a study’s risk of bias through nine questions (detailed in Appendix 2). For each study, the grades for the nine questions are shown below. Grades that receive a star are highlighted in green, while those that do not are highlighted in red. Based on the grades from each question in the Newcastle-Ottawa Scale, an overall risk of bias (high, medium, low) can be assigned (detailed in Appendix 2).

| Study           | <b>Selection:</b><br>Representativeness of the exposed cohort | <b>Selection:</b><br>Selection of the non-exposed cohort | <b>Selection:</b><br>Ascertainment of exposure | <b>Selection:</b><br>Outcome of interest not present at start | <b>Comparability:</b><br>Study controls for level of acute illness | <b>Comparability:</b><br>Study controls for any additional factor | <b>Outcome:</b><br>Assessment of outcome | <b>Outcome:</b><br>Follow-up long enough for outcomes to occur | <b>Outcome:</b><br>Adequacy of follow up of cohorts | Risk of bias |
|-----------------|---------------------------------------------------------------|----------------------------------------------------------|------------------------------------------------|---------------------------------------------------------------|--------------------------------------------------------------------|-------------------------------------------------------------------|------------------------------------------|----------------------------------------------------------------|-----------------------------------------------------|--------------|
| Abbas 2020      | b                                                             | a                                                        | a                                              | a                                                             | b                                                                  | b                                                                 | b                                        | a                                                              | a                                                   | Poor         |
| Allard 2008     | b                                                             | a                                                        | a                                              | a                                                             | b                                                                  | a                                                                 | b                                        | a                                                              | a                                                   | Good         |
| Ammerlaan 2009  | a                                                             | a                                                        | a                                              | a                                                             | b                                                                  | b                                                                 | b                                        | a                                                              | a                                                   | Poor         |
| Asgeirsson 2011 | b                                                             | a                                                        | a                                              | a                                                             | b                                                                  | b                                                                 | b                                        | a                                                              | a                                                   | Poor         |
| Austin 2020     | b                                                             | a                                                        | a                                              | a                                                             | a                                                                  | a                                                                 | b                                        | a                                                              | a                                                   | Good         |
| Ayau 2017       | c                                                             | a                                                        | a                                              | a                                                             | b                                                                  | b                                                                 | b                                        | a                                                              | a                                                   | Poor         |
| Bai 2015        | c                                                             | a                                                        | a                                              | a                                                             | a                                                                  | a                                                                 | b                                        | a                                                              | a                                                   | Good         |
| Bassetti 2017   | b                                                             | a                                                        | a                                              | a                                                             | b                                                                  | b                                                                 | b                                        | a                                                              | a                                                   | Poor         |
| Battle 2022     | b                                                             | a                                                        | a                                              | a                                                             | b                                                                  | b                                                                 | b                                        | a                                                              | a                                                   | Poor         |
| Ben-Zvi 2019    | b                                                             | a                                                        | a                                              | a                                                             | b                                                                  | b                                                                 | b                                        | a                                                              | a                                                   | Poor         |
| Benfield 2007   | b                                                             | a                                                        | a                                              | a                                                             | b                                                                  | a                                                                 | b                                        | a                                                              | b                                                   | Good         |
| Blomfeldt 2016  | b                                                             | a                                                        | a                                              | a                                                             | b                                                                  | a                                                                 | b                                        | a                                                              | d                                                   | Good         |
| Braquet 2016    | b                                                             | a                                                        | a                                              | a                                                             | a                                                                  | a                                                                 | b                                        | a                                                              | b                                                   | Good         |
| Chavez 2022     | b                                                             | a                                                        | a                                              | a                                                             | b                                                                  | b                                                                 | b                                        | a                                                              | d                                                   | Poor         |
| Chen 2010       | b                                                             | a                                                        | a                                              | a                                                             | a                                                                  | a                                                                 | b                                        | a                                                              | a                                                   | Good         |
| Chen 2015       | b                                                             | a                                                        | a                                              | a                                                             | b                                                                  | b                                                                 | b                                        | a                                                              | b                                                   | Poor         |
| Chen 2021       | c                                                             | a                                                        | a                                              | a                                                             | b                                                                  | b                                                                 | b                                        | a                                                              | a                                                   | Poor         |
| Chihara 2009    | c                                                             | a                                                        | a                                              | a                                                             | b                                                                  | b                                                                 | b                                        | a                                                              | a                                                   | Poor         |
| Chung 2021      | c                                                             | a                                                        | a                                              | a                                                             | b                                                                  | b                                                                 | b                                        | a                                                              | a                                                   | Poor         |
| Cobussen 2018   | b                                                             | a                                                        | a                                              | a                                                             | a                                                                  | a                                                                 | b                                        | a                                                              | a                                                   | Good         |
| Cosgrove 2005   | b                                                             | a                                                        | a                                              | a                                                             | b                                                                  | b                                                                 | b                                        | a                                                              | a                                                   | Poor         |
| Eells 2013      | c                                                             | a                                                        | a                                              | a                                                             | a                                                                  | a                                                                 | b                                        | a                                                              | a                                                   | Good         |

|                         |   |   |   |   |   |   |   |   |   |      |
|-------------------------|---|---|---|---|---|---|---|---|---|------|
| Forsblom 2018           | c | a | a | a | a | a | b | a | b | Good |
| Gasch 2013              | c | a | a | a | a | a | b | a | b | Good |
| Greenberg 2014          | b | a | a | a | b | b | b | a | a | Poor |
| Guillamet 2018          | c | a | a | a | b | b | b | a | b | Poor |
| HagstrandAldman 2022    | c | a | a | a | b | b | b | a | a | Poor |
| Halli 2012              | c | a | a | a | b | b | b | a | a | Poor |
| Han 2012                | b | a | a | a | b | b | b | a | a | Poor |
| Honda 2010              | b | a | a | a | b | b | b | a | a | Poor |
| Horváth 2020            | b | a | a | a | b | b | b | a | a | Poor |
| Hsu 2007                | c | a | a | a | b | b | b | a | a | Poor |
| Jokinen 2017            | b | a | a | a | b | b | b | a | c | Poor |
| Joo 2013                | c | a | a | a | a | a | b | a | a | Good |
| Joost 2017              | b | a | a | a | b | b | b | a | d | Poor |
| Jorgensen 2019          | c | a | a | a | b | b | b | a | a | Poor |
| Kang 2018               | b | a | a | a | a | a | b | a | d | Good |
| Kempker 2010            | c | a | a | a | b | b | b | a | a | Poor |
| Kim 2008                | b | a | a | a | b | b | b | a | a | Poor |
| Kim 2010                | b | a | a | a | b | b | b | a | a | Poor |
| Kim 2019                | b | a | a | a | b | b | b | a | d | Poor |
| Kim 2019                | b | a | a | a | b | b | b | a | a | Poor |
| Kobayashi 2014          | b | a | a | a | b | b | b | a | a | Poor |
| Lamagni 2011            | c | a | a | a | a | a | b | a | a | Good |
| Laupland 2022           | b | a | a | a | a | a | b | a | d | Good |
| Lee 2013                | c | a | a | a | b | b | b | a | a | Poor |
| Lee 2021                | c | a | a | a | b | a | b | a | a | Good |
| Lee 2021                | c | a | a | a | b | b | b | a | a | Poor |
| Lesens 2006             | a | a | a | a | b | b | b | a | a | Poor |
| Mansur 2012             | b | a | a | a | a | a | b | a | a | Good |
| Maor 2009               | c | a | a | a | b | a | b | a | d | Good |
| Mejer 2012              | b | a | a | a | b | a | b | a | b | Good |
| Melzer 2013             | c | a | a | a | b | b | b | a | a | Poor |
| Meredith 2021           | b | a | a | a | a | a | b | a | d | Good |
| Mölkänen 2016           | b | a | a | a | b | b | b | a | d | Poor |
| Murdoch 2017            | b | a | a | a | b | a | b | a | d | Good |
| Nambiar 2018            | a | a | a | a | a | a | b | a | d | Good |
| Osthoff 2016            | b | a | a | a | b | a | b | a | d | Good |
| Papadimitriou-Olivgeris | b | a | a | a | b | b | b | a | d | Poor |
| Park 2015               | b | a | a | a | b | b | b | a | d | Poor |
| Paulsen 2015            | b | a | a | a | b | b | b | a | a | Poor |
| Perovic 2006            | b | a | a | a | b | b | b | a | b | Poor |
| Rieg 2009               | b | a | a | a | b | b | b | a | a | Poor |
| Rieg 2013               | b | a | a | a | b | a | b | a | d | Good |
| Roth 2017               | b | a | a | a | b | b | b | a | b | Poor |
| Saunderson 2015         | b | a | a | a | b | a | b | a | a | Good |
| Schneider 2020          | b | a | a | a | b | a | b | a | a | Good |
| Seas 2018               | a | a | a | a | b | b | b | a | b | Poor |
| Smit 2017               | b | a | a | a | a | a | b | a | a | Good |

|                        |   |   |   |   |   |   |   |   |   |      |
|------------------------|---|---|---|---|---|---|---|---|---|------|
| Soriano 2000           | b | a | a | a | a | a | b | a | a | Good |
| Soriano 2008           | c | a | a | a | b | b | b | a | a | Poor |
| Sullivan 2017          | c | a | a | a | b | b | b | a | d | Poor |
| Szubert 2019           | b | a | a | a | a | a | b | a | d | Good |
| Tan 2021               | b | a | a | a | b | b | b | a | d | Poor |
| Ternavasio-delaVega    | b | a | a | a | b | b | b | a | a | Poor |
| Thorlacius-Ussing 2019 | b | a | a | a | b | a | b | a | a | Good |
| Thwaites 2010          | a | a | a | a | b | a | b | a | b | Good |
| Tong 2012              | b | a | a | a | b | b | b | a | a | Poor |
| Turnidge 2007          | b | a | a | a | b | b | b | a | c | Poor |
| Turnidge 2009          | b | a | a | a | b | b | b | a | a | Poor |
| vanHal 2011            | b | a | a | a | b | b | b | a | a | Poor |
| Wang 2008              | c | a | a | a | b | b | b | a | a | Poor |
| Wang 2013              | b | c | a | a | b | b | b | a | a | Poor |
| Wang 2015              | c | a | a | a | b | b | b | a | a | Poor |
| Wi 2018                | a | c | a | a | b | b | b | a | d | Poor |
| Willekens 2021         | b | a | a | a | b | b | b | a | a | Poor |
| Yahav 2017             | b | c | a | a | b | a | b | a | a | Good |
| Yilmaz 2016            | b | a | a | a | b | b | b | a | d | Poor |
| Yoon 2016              | b | a | a | a | b | b | b | a | d | Poor |

**eFigure 1. Sensitivity analysis of unadjusted mortality.** Only studies that either directly reported an odds ratio (OR) or contained raw mortality data such that ORs could be directly calculated are included here. Studies that reported a hazard ratio, relative risk, or mortality rate ratio were excluded.

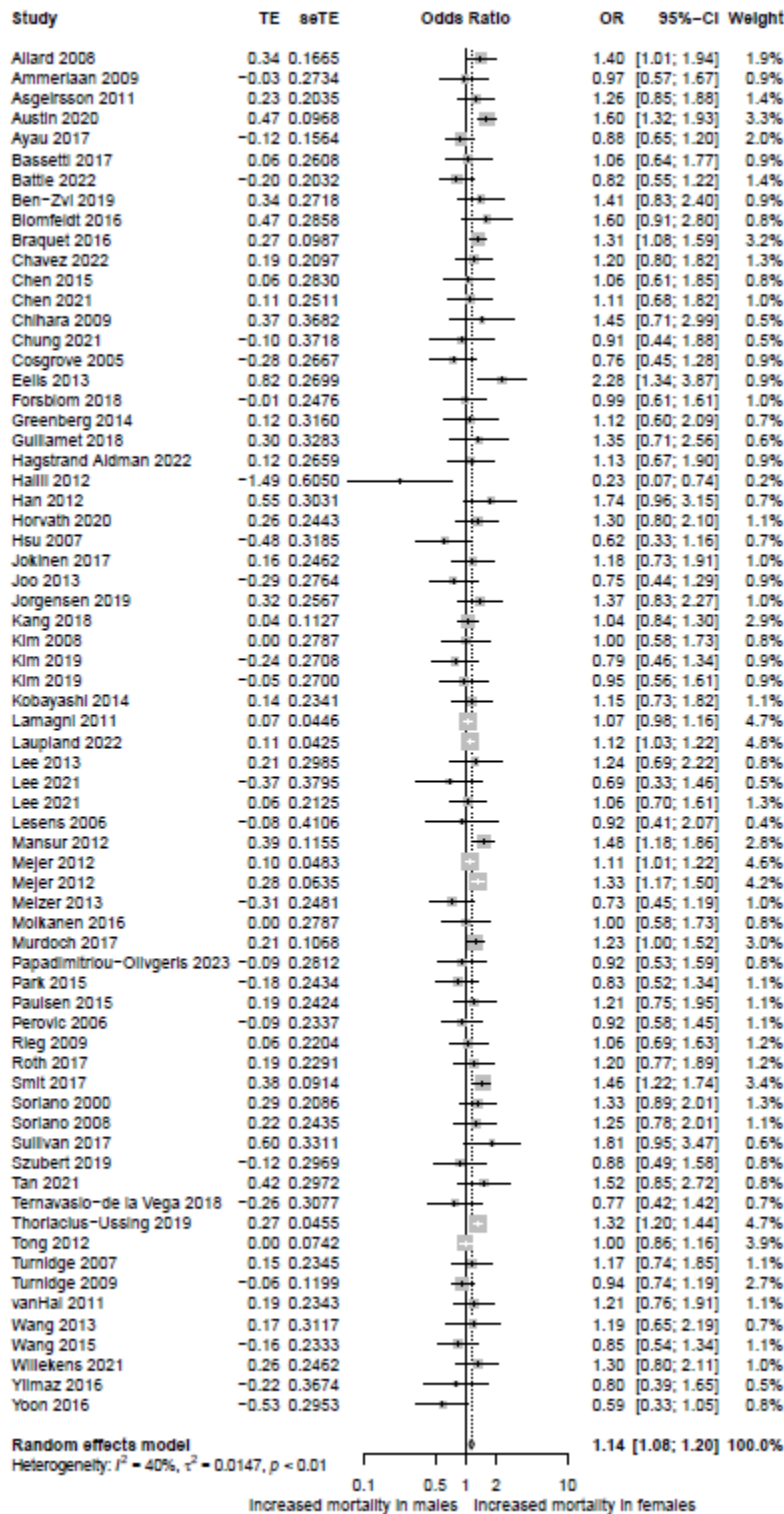

**eFigure 2. Funnel plot of studies included in the analysis of unadjusted mortality.** One study in particular had an effect size that was larger than expected based on the standard error (lower left corner of plot). This study demonstrated significantly lower mortality in females relative to males. Despite this, Egger's test did not reveal significant asymmetry in the funnel plot ( $p=0.06$ ). Thus in total no clear evidence of publication bias was detected.

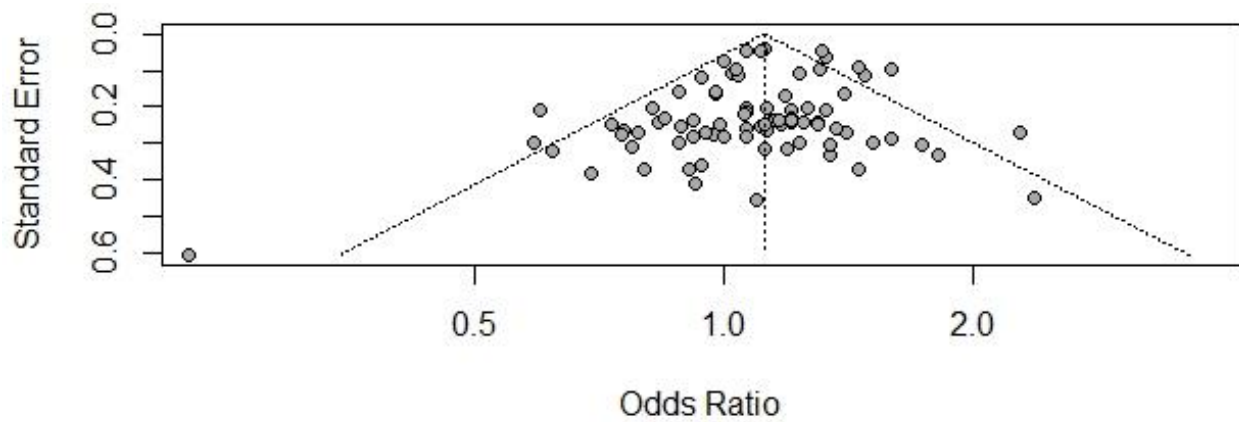

**eAppendix 5. Influence analysis of adjusted mortality in patients with *Staphylococcus aureus***

**bacteremia.** An influence analysis showed that the overall results of the meta-analysis (i.e., association of female sex with increased mortality) did not change with removal of individual studies.

|                                 | OR     | 95%-CI           | p-value  | tauA2  | tau    | IA2   |
|---------------------------------|--------|------------------|----------|--------|--------|-------|
| Omitting Allard 2008            | 1.1757 | [1.0998; 1.2568] | < 0.0001 | 0.0117 | 0.1084 | 50.0% |
| Omitting Austin 2020            | 1.1619 | [1.0920; 1.2363] | < 0.0001 | 0.0081 | 0.0898 | 44.1% |
| Omitting Bai 2015               | 1.1784 | [1.1021; 1.2600] | < 0.0001 | 0.0121 | 0.1102 | 50.7% |
| Omitting Benfield 2007          | 1.1956 | [1.1181; 1.2785] | < 0.0001 | 0.0109 | 0.1045 | 48.1% |
| Omitting Benfield 2007          | 1.1956 | [1.1164; 1.2805] | < 0.0001 | 0.0117 | 0.1084 | 47.4% |
| Omitting Blomfeldt 2016         | 1.1840 | [1.1053; 1.2683] | < 0.0001 | 0.0128 | 0.1132 | 52.2% |
| Omitting Braquet 2016           | 1.1780 | [1.0993; 1.2623] | < 0.0001 | 0.0127 | 0.1127 | 50.8% |
| Omitting Chen 2010              | 1.1911 | [1.1132; 1.2744] | < 0.0001 | 0.0125 | 0.1119 | 51.1% |
| Omitting Cobussen 2018          | 1.1840 | [1.1057; 1.2678] | < 0.0001 | 0.0126 | 0.1124 | 52.2% |
| Omitting Eells 2013             | 1.1753 | [1.1026; 1.2528] | < 0.0001 | 0.0114 | 0.1069 | 48.3% |
| Omitting Forsblom 2018          | 1.1838 | [1.1047; 1.2685] | < 0.0001 | 0.0130 | 0.1140 | 52.2% |
| Omitting Gasch 2013             | 1.1796 | [1.1016; 1.2632] | < 0.0001 | 0.0126 | 0.1123 | 51.4% |
| Omitting Joo 2013               | 1.1837 | [1.1051; 1.2678] | < 0.0001 | 0.0128 | 0.1130 | 52.2% |
| Omitting Kang 2018              | 1.1923 | [1.1158; 1.2740] | < 0.0001 | 0.0120 | 0.1094 | 50.1% |
| Omitting Lamagni 2011           | 1.1953 | [1.1155; 1.2807] | < 0.0001 | 0.0122 | 0.1103 | 48.1% |
| Omitting Laupland 2022          | 1.1884 | [1.1061; 1.2769] | < 0.0001 | 0.0146 | 0.1209 | 52.2% |
| Omitting Lee 2021               | 1.1845 | [1.1054; 1.2693] | < 0.0001 | 0.0130 | 0.1142 | 52.2% |
| Omitting Mansur 2012            | 1.1715 | [1.0967; 1.2514] | < 0.0001 | 0.0108 | 0.1041 | 48.6% |
| Omitting Maor 2009              | 1.1775 | [1.1024; 1.2577] | < 0.0001 | 0.0119 | 0.1092 | 50.0% |
| Omitting Mejer 2012             | 1.1911 | [1.1089; 1.2793] | < 0.0001 | 0.0143 | 0.1196 | 51.9% |
| Omitting Mejer 2012             | 1.1833 | [1.1016; 1.2711] | < 0.0001 | 0.0143 | 0.1196 | 51.0% |
| Omitting Meredith 2021          | 1.1864 | [1.1076; 1.2708] | < 0.0001 | 0.0129 | 0.1138 | 52.1% |
| Omitting Murdoch 2017           | 1.1853 | [1.1047; 1.2718] | < 0.0001 | 0.0138 | 0.1174 | 52.2% |
| Omitting Nambiar 2018           | 1.1850 | [1.1042; 1.2718] | < 0.0001 | 0.0139 | 0.1180 | 52.1% |
| Omitting Osthoff 2016           | 1.1890 | [1.1110; 1.2725] | < 0.0001 | 0.0128 | 0.1129 | 51.5% |
| Omitting Rieg 2013              | 1.1873 | [1.1102; 1.2697] | < 0.0001 | 0.0126 | 0.1124 | 51.2% |
| Omitting Saunderson 2015        | 1.1867 | [1.1080; 1.2710] | < 0.0001 | 0.0129 | 0.1137 | 52.0% |
| Omitting Schneider 2020         | 1.1820 | [1.1034; 1.2661] | < 0.0001 | 0.0128 | 0.1132 | 51.9% |
| Omitting Smit 2017              | 1.1757 | [1.0974; 1.2596] | < 0.0001 | 0.0123 | 0.1110 | 49.8% |
| Omitting Soriano 2000           | 1.1776 | [1.1015; 1.2588] | < 0.0001 | 0.0120 | 0.1096 | 50.4% |
| Omitting Szubert 2019           | 1.1887 | [1.1127; 1.2698] | < 0.0001 | 0.0125 | 0.1117 | 50.4% |
| Omitting Thorlacius-Ussing 2019 | 1.1848 | [1.1028; 1.2729] | < 0.0001 | 0.0145 | 0.1204 | 51.5% |
| Omitting Thwaites 2010          | 1.1876 | [1.1087; 1.2722] | < 0.0001 | 0.0130 | 0.1142 | 52.0% |
| Omitting Yahav 2017             | 1.1762 | [1.0989; 1.2589] | < 0.0001 | 0.0121 | 0.1100 | 50.4% |
| Pooled estimate                 | 1.1836 | [1.1067; 1.2658] | < 0.0001 | 0.0125 | 0.1119 | 50.7% |

**eFigure 3. Sensitivity analysis adjusted mortality.** Only studies that either directly reported an odds ratio (OR) or contained raw mortality data such that ORs could be directly calculated are included here. Studies that reported a hazard ratio, relative risk, or mortality rate ratio were excluded.

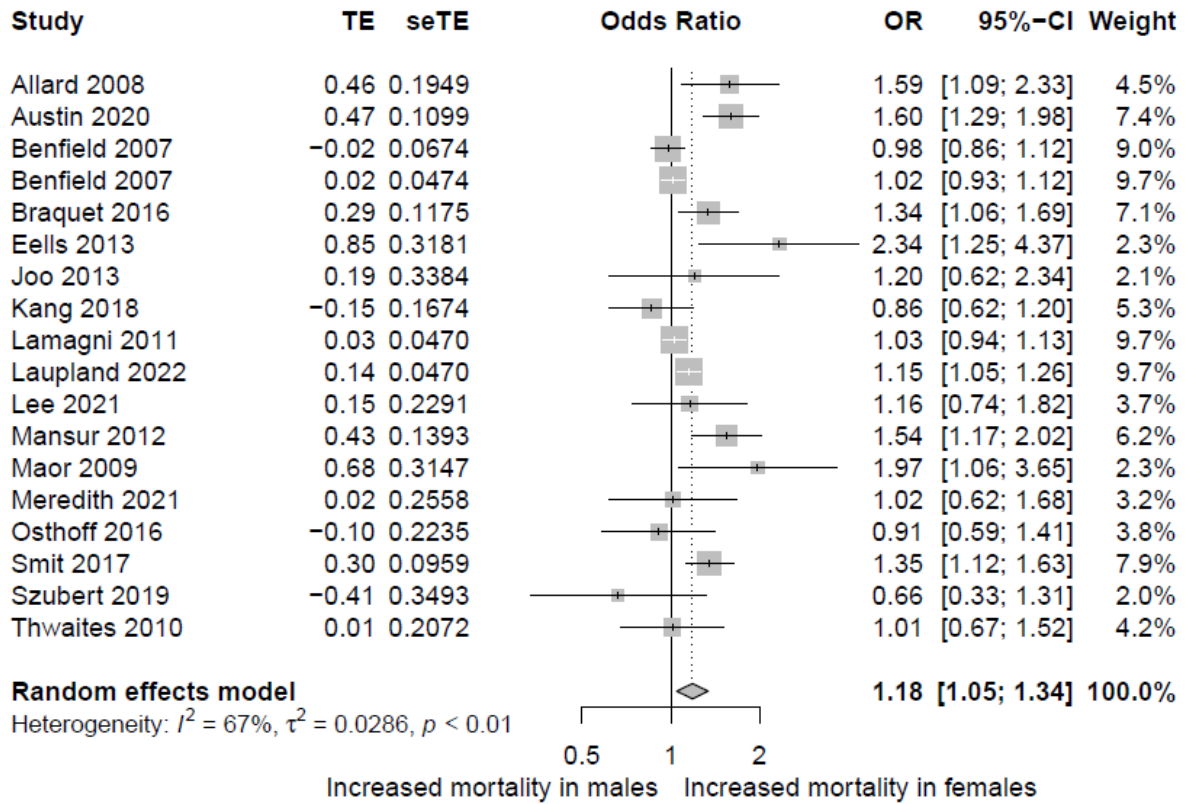



**eFigure 4. Funnel plot for studies included in analysis of adjusted mortality.** Egger's test did not reveal significant asymmetry in the funnel plot ( $p=0.10$ ).

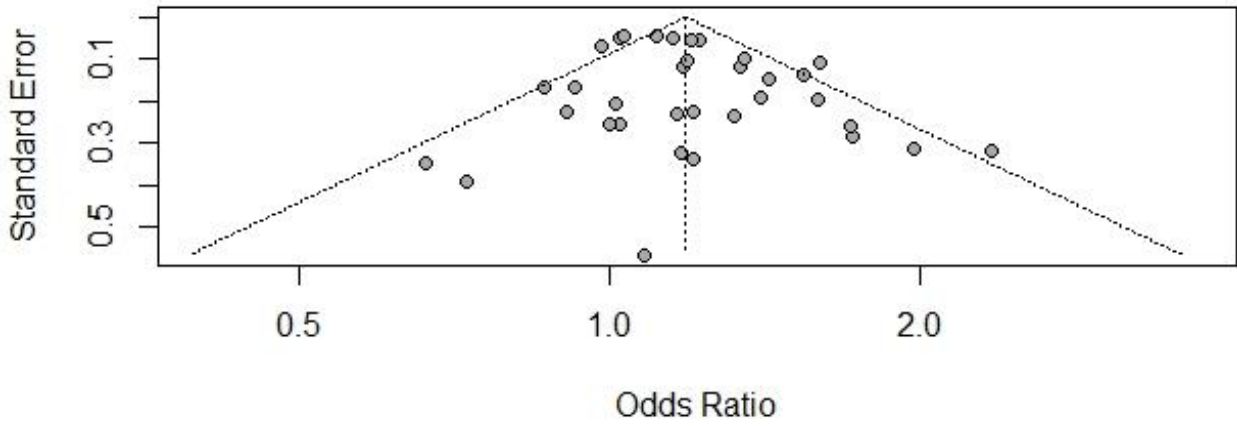

**eTable 2. Evidence profile for association of female sex and mortality in patients with *Staphylococcus aureus* bacteremia.**

|                                     |                                                                                                          |
|-------------------------------------|----------------------------------------------------------------------------------------------------------|
| <b>Patient population</b>           | Patients with <i>Staphylococcus aureus</i> bacteremia                                                    |
| <b>Setting</b>                      | Hospital                                                                                                 |
| <b>Intervention</b>                 | Female sex                                                                                               |
| <b>Comparison</b>                   | Male sex                                                                                                 |
| <b>Outcome</b>                      | Mortality                                                                                                |
| <b>Studies (participants)</b>       | 89 (132,582)                                                                                             |
| <b>Risk of bias</b>                 | High                                                                                                     |
| <b>Consistency</b>                  | Consistent                                                                                               |
| <b>Precision</b>                    | Precise                                                                                                  |
| <b>Directness</b>                   | Direct                                                                                                   |
| <b>Other limitations</b>            | Sex-difference was not the primary outcome of interest in the majority of the studies that were included |
| <b>Overall strength of evidence</b> | Low                                                                                                      |
| <b>Conclusion</b>                   | Female sex is associated with higher mortality in patients with SAB                                      |
| <b>Summary estimate</b>             | Unadjusted: 1.12 (95%CI 1.07-1.18)<br>Adjusted: 1.18 (95%CI 1.11-1.27)                                   |
