# Supplementary material for: Female Sex and Mortality in Patients with Staphylococcus aureus Bacteremia: A Systematic Review and Meta-analysis
Source: PubMed Central journal article supplement (PMC10900971; doi:10.1001/jamanetworkopen.2024.0473), 2024-02-27
Supplement: jamanetwopen-e240473-s002.pdf [file jamanetwopen-e240473-s002.pdf]

## **Data Sharing Statement**

### **Data**

**Data available:** No

### **Additional Information**

**Explanation for why data not available:** Data generated during this study will be shared on request.
